# Supplementary material for: Supramolecular interaction of sanguinarine dye with sulfobutylether-β-cyclodextrin: modulation of the photophysical properties and antibacterial activity
Source: Royal Society of Chemistry journal article supplement (doi:10.1039/d0ra03823g), 2020-01-01
Supplement: d0ra03823g1.pdf [file d0ra03823g1.pdf]

## Electronic Supplementary Information

### Supramolecular interaction of sanguinarine dye with sulfobutylether- $\beta$ -cyclodextrin: Modulation in the photophysical properties and antibacterial activity

Vidya Kadam,<sup>a,§</sup> Aarti S. Kakatkar,<sup>b</sup> Nilotpal Barooah,<sup>a</sup> Suchandra Chatterjee,<sup>b,c</sup> Achikanath C. Bhasikuttan,<sup>a,c,\*</sup> Jyotirmayee Mohanty<sup>a,c,\*</sup>

<sup>a</sup>Radiation & Photochemistry Division, <sup>b</sup>Food Technology Division, Bhabha Atomic Research Centre, Mumbai, 400085 INDIA. <sup>c</sup>Homi Bhabha National Institute, Training School Complex, Anushaktinagar, Mumbai, 400094, India. <sup>†</sup>Student of D.B.F Dayanand College of Arts and Science, Solapur, India

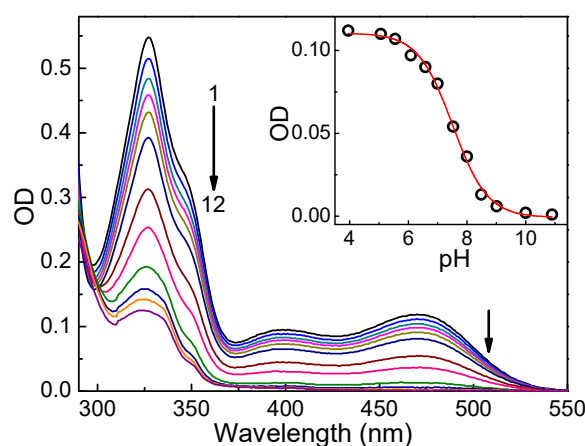

**Fig. S1** Absorption spectra of sanguinarine at different pH values. pH: 4.0 (1), 5.1 (2), 5.6 (3), 6.1 (4), 6.6 (5), 7.1 (6), 7.6 (7), 8.1 (8), 8.6 (9), 9.1 (10), 10.1 (11) and 11.0 (12). **Inset** shows the  $pK_a$  curve (variation in absorbance with pH at 470 nm).

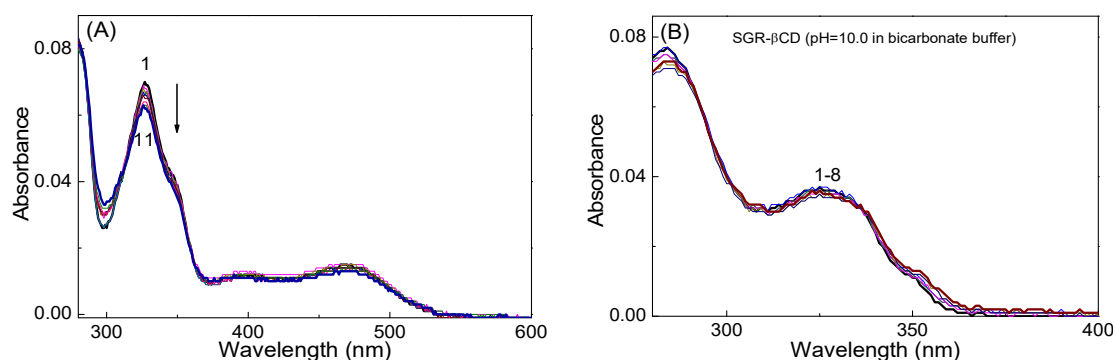

**Fig. S2** (A) Absorption spectra of sanguinarine at different concentrations of  $\beta$ CD at pH 6.0.  $[\beta\text{CD}]/\mu\text{M}$ : (1) 0, (2) 2, (3) 7, (4) 22, (5) 44, (6) 144, (7) 226, (8) 376, (9) 553, (10) 724 and (11) 889. (B) Absorption spectra of sanguinarine at different concentrations of  $\beta$ CD at pH 10.  $[\beta\text{CD}]/\mu\text{M}$ : (1) 0, (2) 12, (3) 25, (4) 50, (5) 98, (6) 249, (7) 455 and (8) 677.

### Method M1

In the present systems, the binding constant ( $K$ ) for the different forms of the sanguinarine (SGR) dye with both the  $\text{SBE}_7\beta\text{CD}$  and  $\beta\text{CD}$  macrocyclic hosts ( $H$ ) were estimated at suitable pH conditions by the fluorescence titration method assuming 1:1 complexation stoichiometry. At any stage, the observed fluorescence intensity  $I_f$  corresponds to the sum of the fluorescence intensities arising from the free SGR and  $H$ :SGR and are directly proportional to their respective concentrations present in the solution. Therefore, one can write

$$I_f = I_f^0 \frac{[\text{SGR}]_{\text{eq}}}{[\text{SGR}]_0} + I_{H:\text{SGR}} \frac{[H:\text{SGR}]_{\text{eq}}}{[\text{SGR}]_0} \quad (\text{S1})$$

where  $I_f^0$  is the fluorescence intensity in the absence of host and  $I_{H:\text{SGR}}$  is the fluorescence intensity when all SGR molecules are complexed with the host in a 1:1 complex.  $[\text{SGR}]_0$  and  $[H]_0$  are the total concentrations of SGR and  $H$  used. Equation S1 can be rearranged into a modified Benesi-Hildebrand equation as in equation S2,<sup>1</sup>

$$I_f = \frac{I_f^0 + I_{H:\text{SGR}}K[H]_0}{1 + K[H]_0} \quad (\text{S2})$$

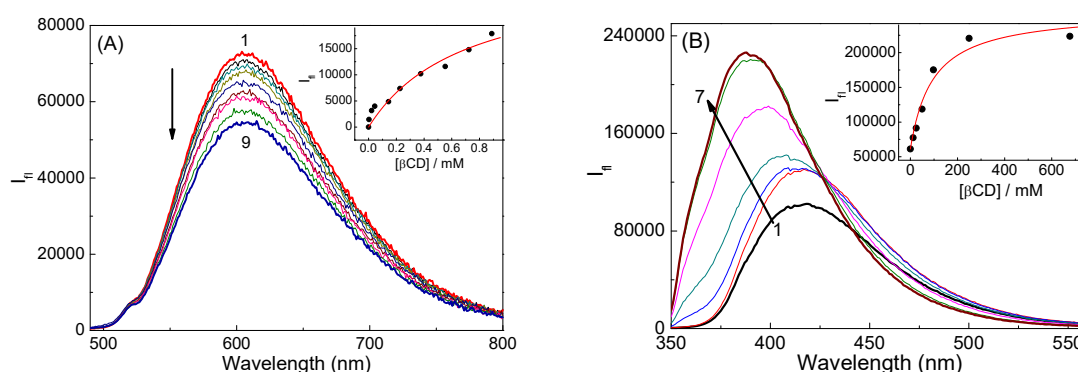

**Fig. S3** (A) Fluorescence spectra of  $\text{SG}^+$  at different concentrations of  $\beta\text{CD}$  at pH 6.0.  $[\beta\text{CD}] / \mu\text{M}$ : (1) 0.0, (2) 2.4, (3) 21.5, (4) 144.2, (5) 226.2, (6) 375.6, (7) 553.0, (8) 724.0 and (9) 889.0. (B) Fluorescence spectra of  $\text{SGOH}$  at different concentrations of  $\beta\text{CD}$  at pH 10.0.  $[\beta\text{CD}] / \mu\text{M}$ : (1) 0.0, (2) 12.0, (3) 25.0, (4) 49.5, (5) 98.0, (6) 249.0 and (7) 676.5.

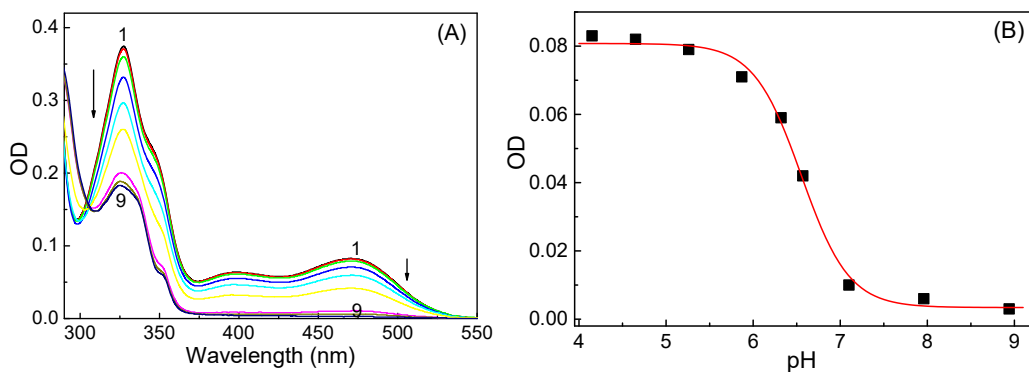

**Fig. S4** (A) Absorption spectra of sanguinarine in the presence of 2 mM  $\beta$ CD at different pH values. pH: 1) 4.15, 2) 4.65, 3) 5.26, 4) 5.87, 5) 6.32, 6) 6.57, 7) 7.10, 8) 7.96 and 9) 8.94. (B)  $pK_a$  curve of SGR in the presence of  $\beta$ CD (variation in absorbance with pH at 470 nm).

**Table S1.** Changes in the  $pK_a$  value obtained from absorption studies of SGR in the presence of SBE<sub>7</sub> $\beta$ CD and  $\beta$ CD hosts.

| Systems                               | $pK_a$ (abs) | $\Delta pK_a$ (abs) |
|---------------------------------------|--------------|---------------------|
| SGR                                   | 7.5          | ---                 |
| SGR-SBE <sub>7</sub> $\beta$ CD (2mM) | 8.1          | +0.6                |
| SGR- $\beta$ CD (2mM)                 | 6.55         | -0.95               |

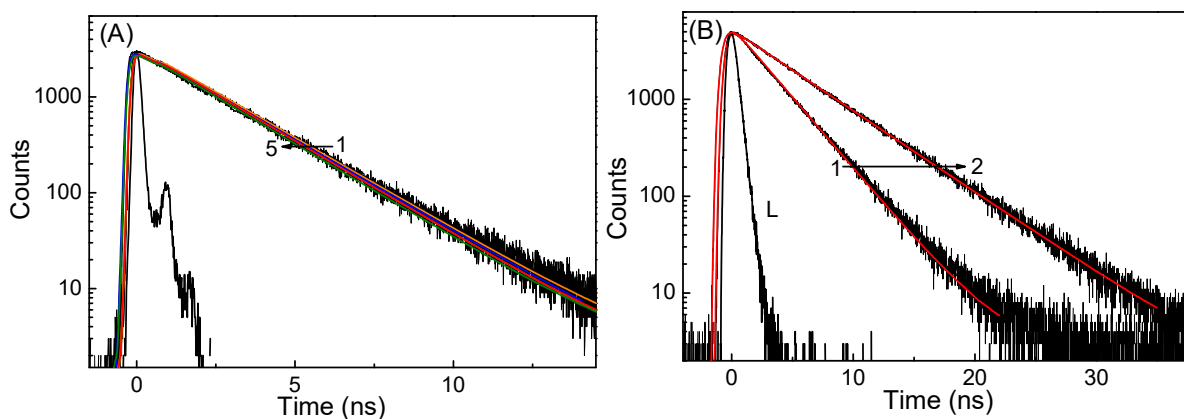

**Fig. S5** (A) Lifetime decay traces of  $SG^+$  form at different concentrations of  $\beta$ CD at pH 6.0 [ $\beta$ CD]/mM: (1) 0.0, (2) 0.24, (3) 0.87, (4) 1.7 and (5) 2.9.  $\lambda_{ex}$  = 445 nm,  $\lambda_{em}$  = 605 nm. (B) Lifetime decay traces of SGOH form in the absence (1) and presence (2) of 1 mM of  $\beta$ CD at pH 10.  $\lambda_{ex}$  = 339 nm,  $\lambda_{em}$  = 380 nm.

**Table S2.** Excited-state decay time constants for SG<sup>+</sup> form monitored at 605 nm and SGOH form monitored at 380 nm at the saturated concentration of SBE<sub>7</sub>βCD and βCD.

| Systems                                        | $\tau_1$ (ns), $a_1$ (%) | $\tau_2$ (ns), $a_2$ (%) | $\langle\tau\rangle$ (ns) | $\tau_r$ (ps) |
|------------------------------------------------|--------------------------|--------------------------|---------------------------|---------------|
| SG <sup>+</sup>                                | 2.28 (100)               | ---                      | 2.28                      | 186 ± 50      |
| SG <sup>+</sup> :SBE <sub>7</sub> βCD (350 μM) | 2.32 (79)                | 0.84 (21)                | 2.00                      | 575 ± 50      |
| SG <sup>+</sup> :βCD (2.9 mM)                  | 2.17 (100)               | ---                      | 2.17                      | 285 ± 50      |
| SGOH                                           | 3.03 (100)               | ---                      | 3.03                      |               |
| SGOH:SBE <sub>7</sub> βCD (1.2 mM)             | 5.11 (97)                | 2.25 (3%)                | 5.02                      |               |
| SGOH:βCD (1 mM)                                | 5.07 (100)               | ---                      | 5.07                      |               |

**Table S3.** Minimal inhibitory concentration of sanguinarine (SGR) at different solution conditions towards four pathogenic bacteria at physiological pH 7.4. All the experiments are done in duplicate and each repeated thrice.

| Systems                        | Minimum inhibitory concentration in μM (μg/ml) |                  |                |                       |
|--------------------------------|------------------------------------------------|------------------|----------------|-----------------------|
|                                | <i>B. cereus</i>                               | <i>S. aureus</i> | <i>E. coli</i> | <i>S. typhimurium</i> |
| SGR                            | 14.7                                           | 29.4             | 14.7           | 14.7                  |
| SGR-SBE <sub>7</sub> βCD (2mM) | 7.5                                            | 14.7             | 7.5            | 14.7                  |
| SGR-βCD (2mM)                  | 14.7                                           | 29.4             | 14.7           | 14.7                  |

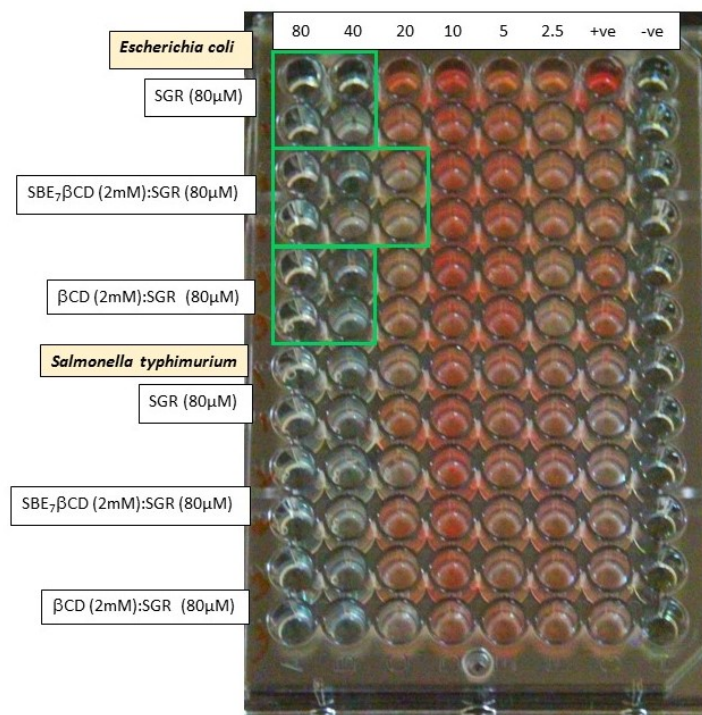

**Fig. S6** Antibacterial study of SGR in the absence and presence of SBE<sub>7</sub>βCD (2 mM) and βCD (2mM) against *E. coli* and *S. typhimurium* at physiological pH 7.4.

## Reference

1. M. K. Singh, H. Pal, A. S. R. Koti, A. V. Sapre, *J. Phys. Chem. A*, 2004, **108**, 1465-1474.
